# Supplementary material
Source: PubMed Central journal article supplement (PMC6889758)

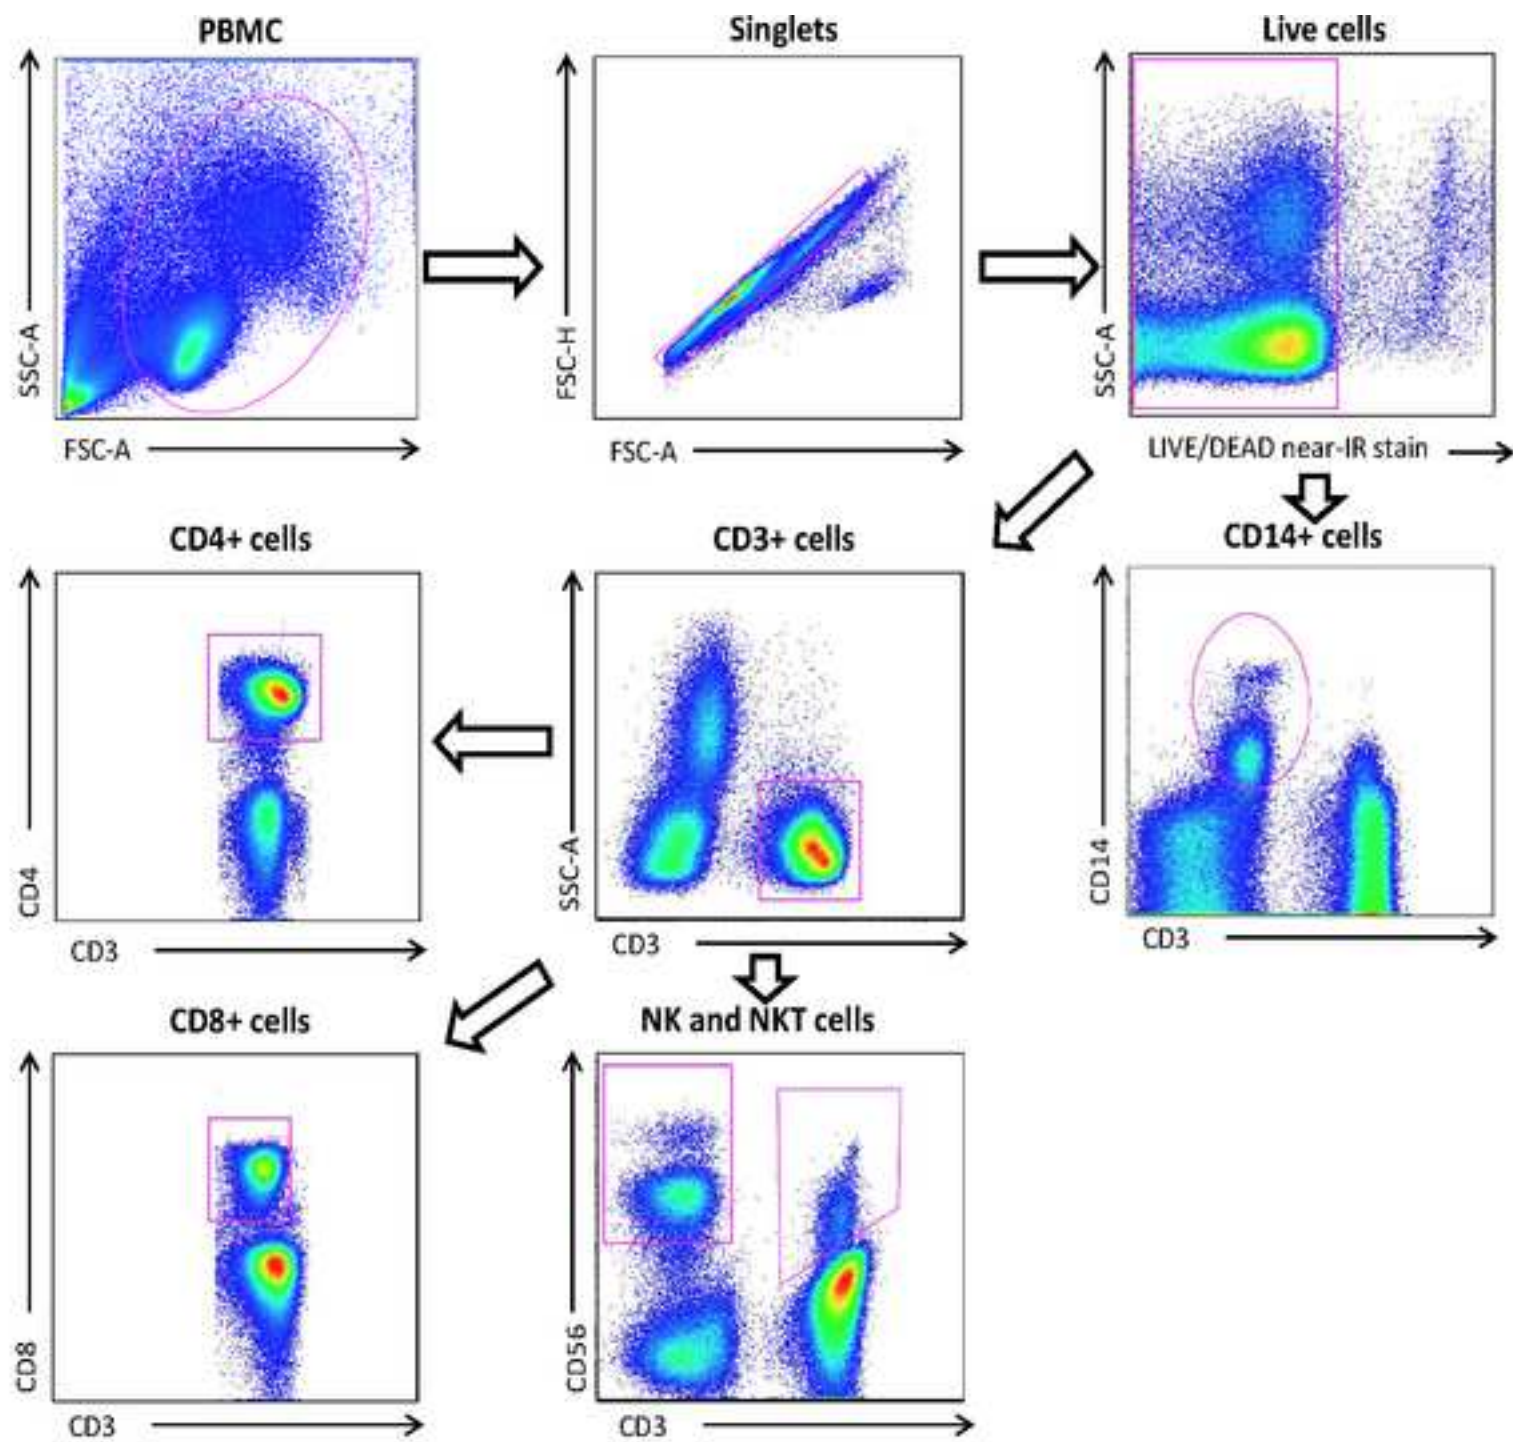

Supplement: ofz484_suppl_supplementary_figure_1.pdf [file ofz484_suppl_supplementary_figure_1.pdf]

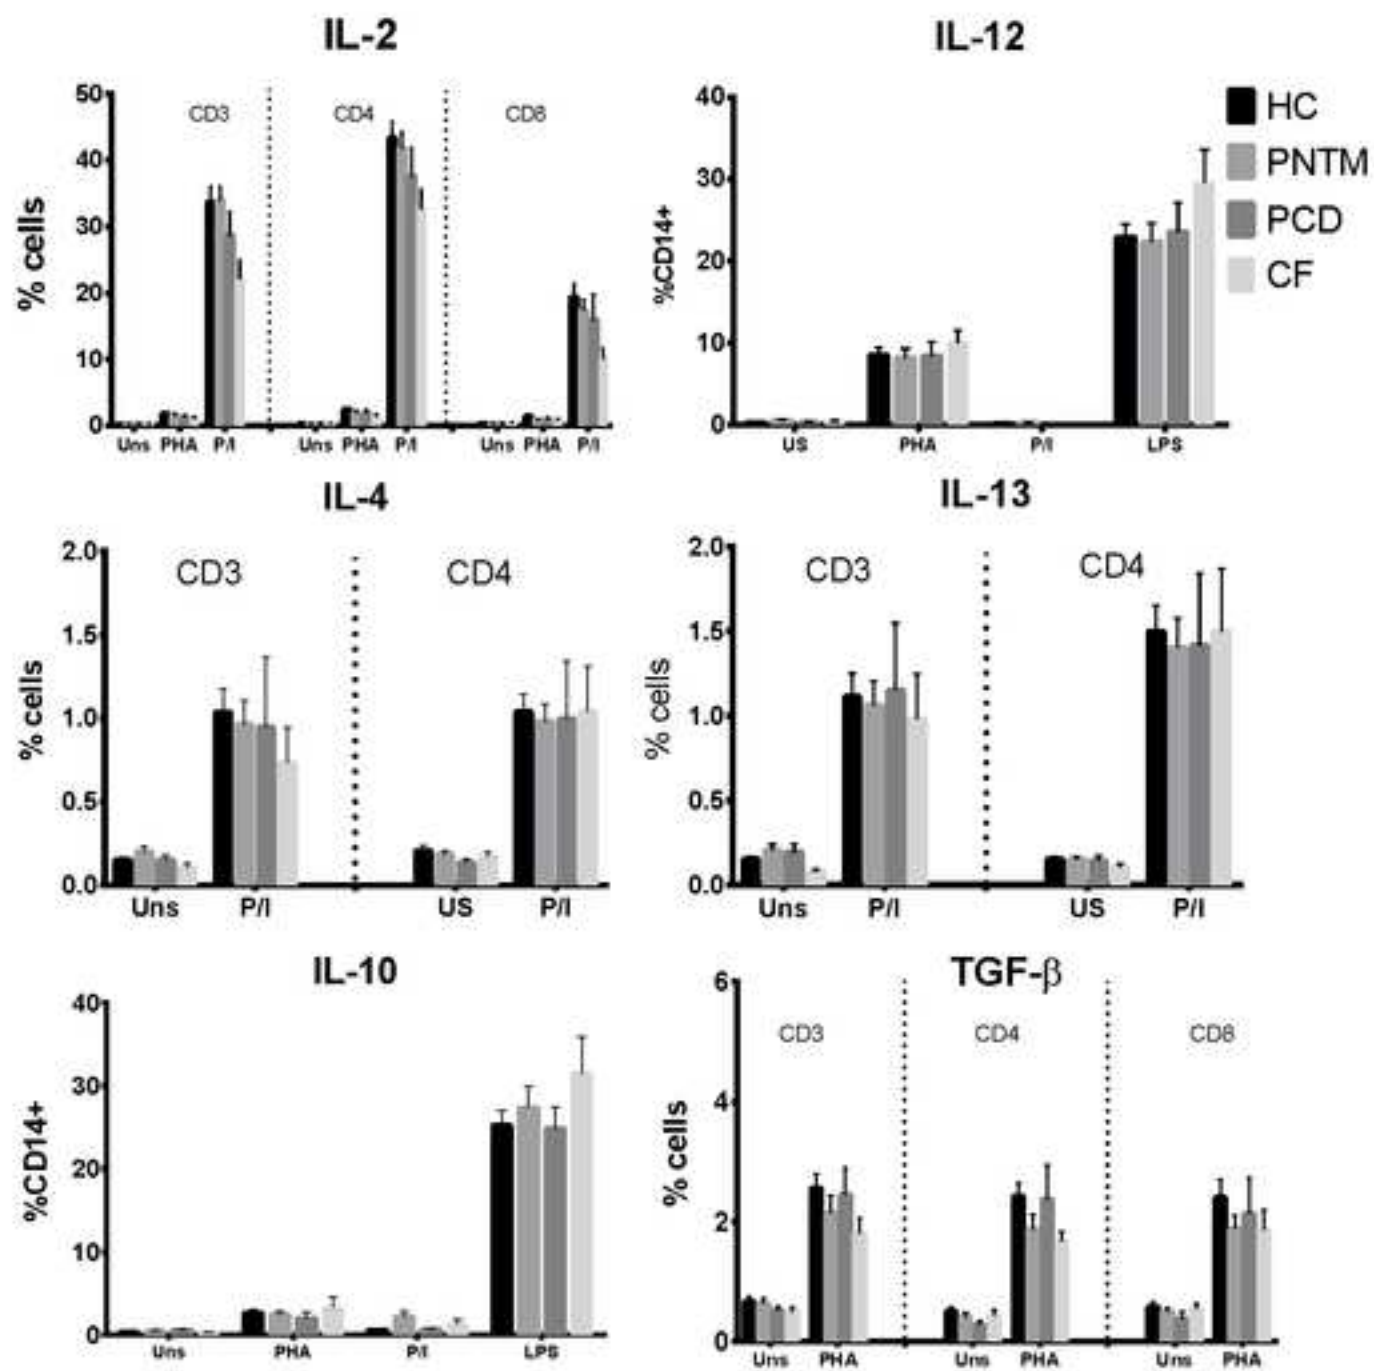

Supplement: ofz484_suppl_supplementary_figure_2.pdf [file ofz484_suppl_supplementary_figure_2.pdf]

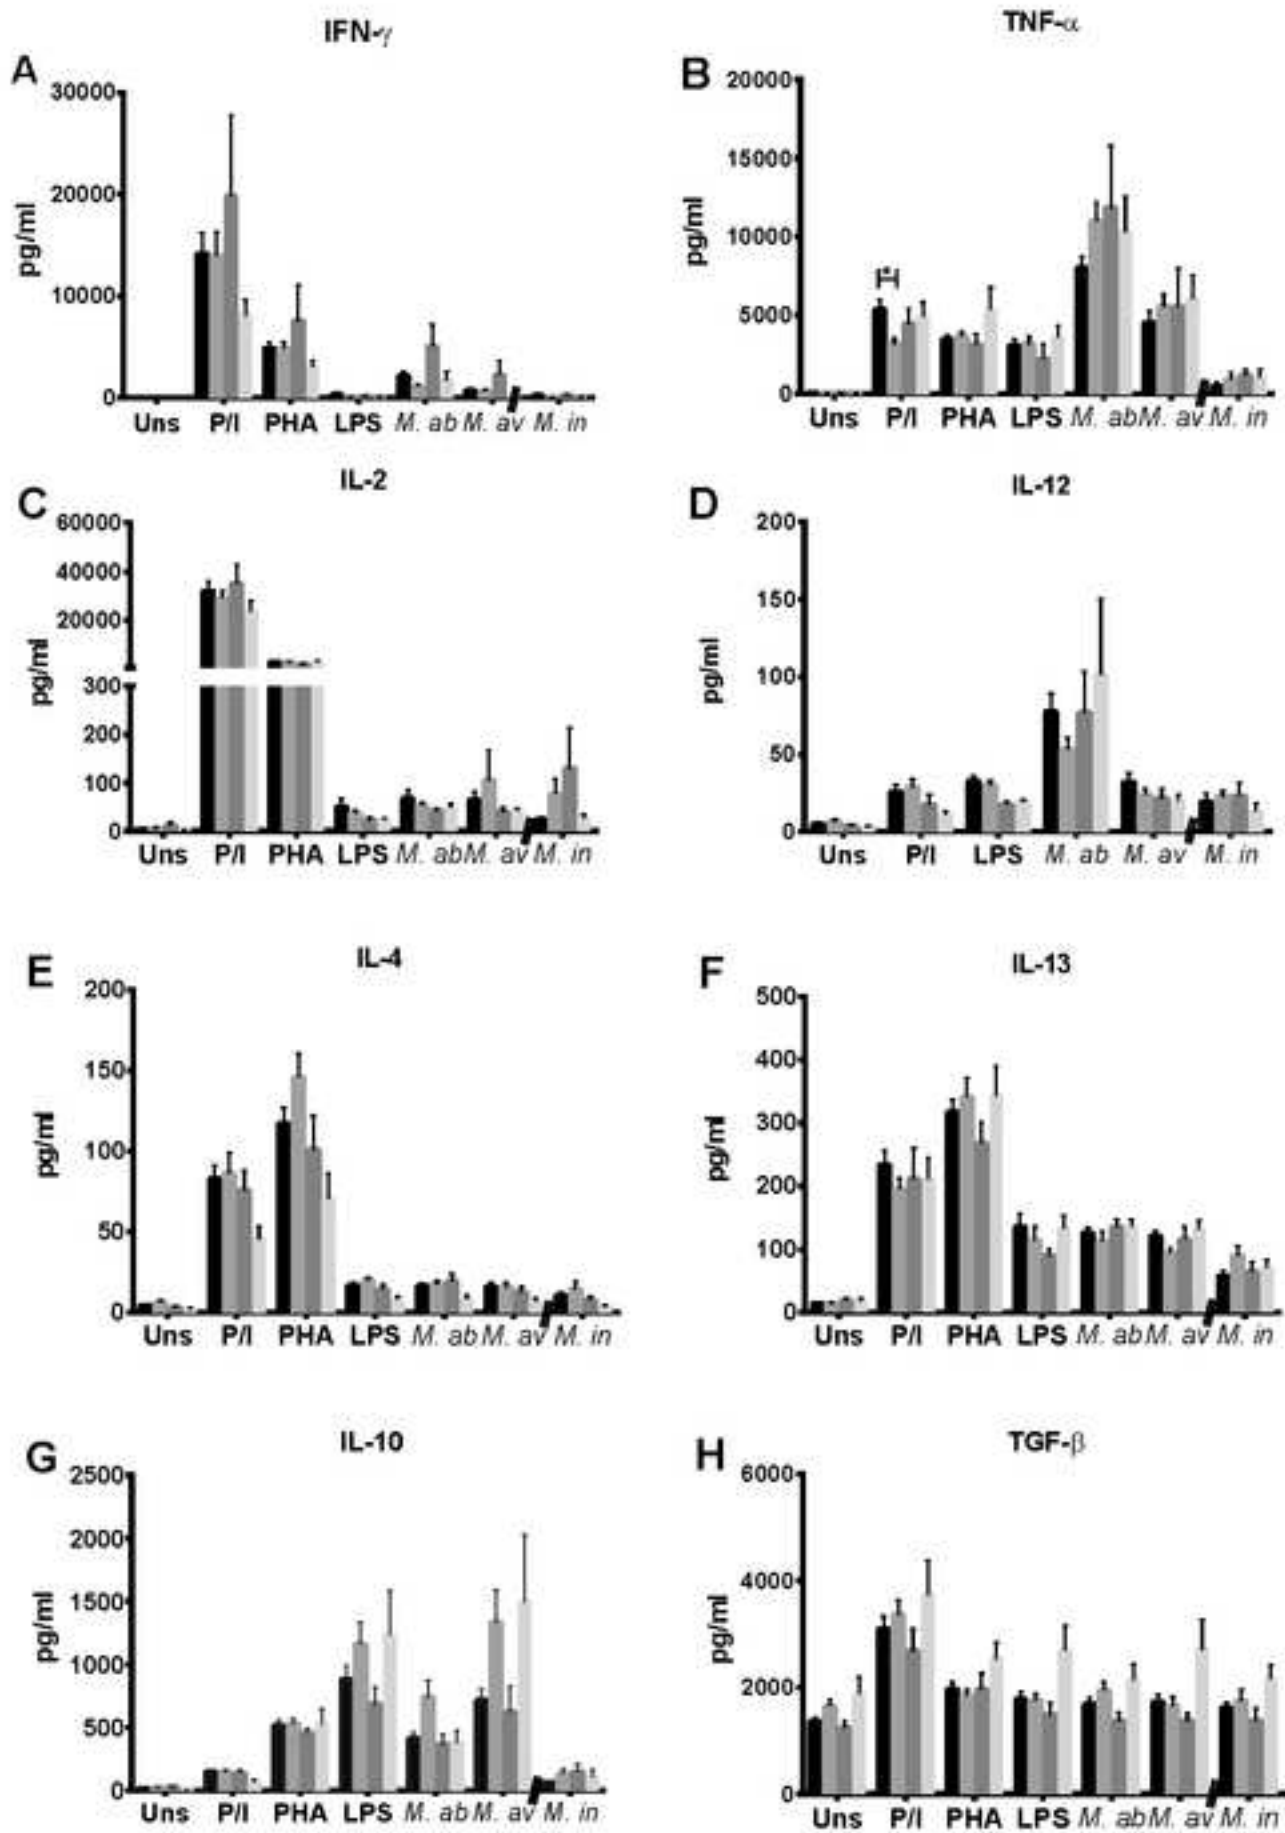

Supplement: ofz484_suppl_supplementary_figure_3.pdf [file ofz484_suppl_supplementary_figure_3.pdf]
